# Supplementary material
Source: PubMed Central journal article supplement (PMC6072556)
Supplement: NIHMS964306-supplement-1.pdf [file NIHMS964306-supplement-1.pdf]

# Supplementary Data

## Supplementary Figure S1

A

| Patient information and Key Clinical Characteristics: Melanoma Cohort |     |        |            |                                              |            |           |      |       |           |                     |
|-----------------------------------------------------------------------|-----|--------|------------|----------------------------------------------|------------|-----------|------|-------|-----------|---------------------|
| Sample ID                                                             | Age | Gender | Grade      | Tumor Location                               | Microarray | Exome Seq | PTEN | BRAF  | NRAS      | TP53                |
| YUCOT                                                                 | 33  | F      | IV         | metastasis to ulna (long bone of forearm)    | ✓          | ✓         | WT   | V600E | WT        | R196X-R and R213X-R |
| YUDOSO                                                                | 84  | M      | b. primary | left abdomen                                 | ✓          | ✓         | WT   | WT    | Q61K      | WT                  |
| YUFIC                                                                 | 65  | M      | III        | metastasis to inguinal lymph node            | ✓          | ✓         | WT   | E304K | Q61R      | WT                  |
| YUGANK                                                                | 78  | M      | IV         | metastasis to brain                          | ✓          | ✓         | WT   | WT    | Q61K      | WT                  |
| YUGASP                                                                | 88  | F      | III        | metastasis to right inguinal lymph node      | ✓          | ✓         | WT   | WT    | Q61L      | WT                  |
| YUGEN8                                                                | 44  | F      | IV         | metastasis to brain                          | ✓          | ✓         | Null | V600E | WT        | WT                  |
| YUGOE                                                                 | 55  | M      | III        | recurrence to right neck                     | ✓          | ✓         | WT   | WT    | G12V      | R342X-R             |
| YUHOIN                                                                | 59  | F      | III        | metastasis to right sub maxillary lymph node | ✓          | ✓         | WT   | WT    | WT        | WT                  |
| YUHUY                                                                 | 64  | M      | III        | metastasis to right axillary lymph node      | ✓          | ✓         | Null | V600E | WT        | WT                  |
| YUKADI                                                                | 56  | M      | IIIC       | metastasis to right chest                    | ✓          | ✓         | WT   | V600E | WT        | WT                  |
| YUKSI                                                                 | 62  | M      | IV         | metastasis to right neck                     | ✓          | ✓         | WT   | V600K | WT        | Q317X               |
| YUMUT                                                                 | 44  | M      | III        | metastasis to soft tissue of wrist           | ✓          | ✓         | Null | V600E | WT        | WT                  |
| YUNUFF                                                                | 59  | F      | IV         | pleural cavity fluid (metastasis)            | ✓          | ✓         | Null | V600E | WT        | R158H               |
| YUROB                                                                 | 76  | F      | IV         | metastasis to abdominal wall                 | ✓          | ✓         | WT   | WT    | HRAS-Q61K | WT                  |
| YUROL                                                                 | 85  | M      | III        | recurrence right posterior calf              | ✓          | ✓         | Null | WT    | WT        | WT                  |
| YUSAC2                                                                | 46  | M      | IV         | Left neck                                    | ✓          | ✓         | WT   | V600E | WT        | WT                  |
| YUTICA                                                                | 65  | M      | IV         | pleural cavity fluid (metastasis)            | ✓          | ✓         | WT   | WT    | Q61R      | WT                  |

B

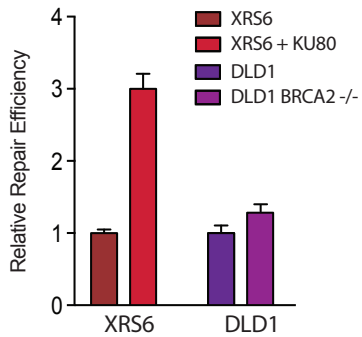

C

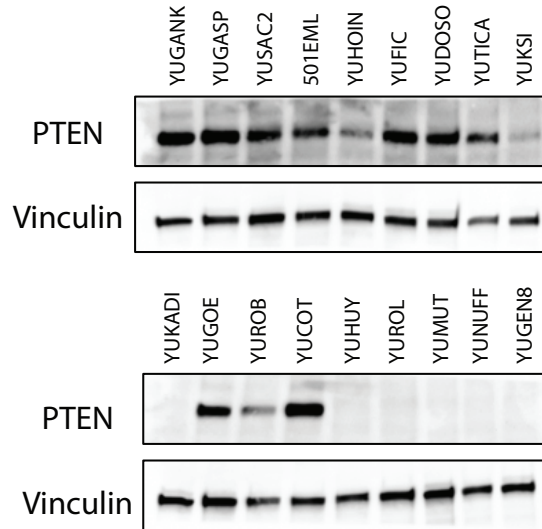

D

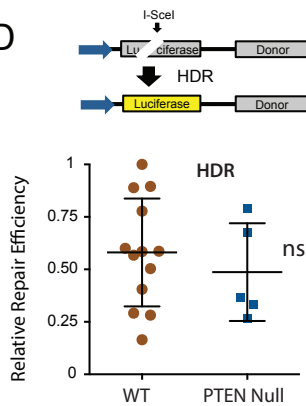

E

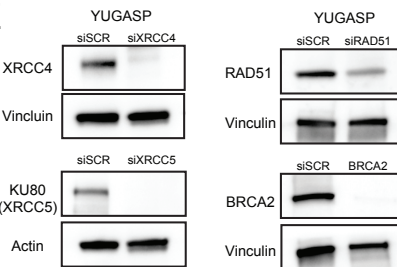

F

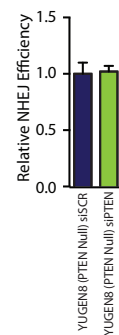

**Supplementary Figure S1.**

(A) Key clinical characteristics of the Yale patient-derived melanoma sample cohort. (B) Quantification of the NHEJ luciferase based reporter assay in the XRS6 cells deficient in Ku80 compared to the Ku80 complemented cells and in the DLD1 cells after BRCA2 homozygous knockout. (C) Western blot analysis of PTEN levels in the patient-derived, short-term melanoma cultures. Vinculin is used as a loading control. (D) Quantification of homology-dependent repair (HDR) reporter assay performed in patient-derived, short-term melanoma cultures. (E) Western blot analysis of siRNA knockdown of XRCC4, XRCC5, RAD51 and BRCA2 in the YUGASP patient-derived, short-term melanoma culture. (F) Quantification of the NHEJ luciferase based reporter assay in the PTEN-null YUGEN8 melanoma cells after transfection with siRNA targeting PTEN or scrambled control siRNA.
