# Supplementary material
Source: PubMed Central journal article supplement (PMC6072556)
Supplement: NIHMS964306-supplement-2.pdf [file NIHMS964306-supplement-2.pdf]

# Supplementary Figure S2

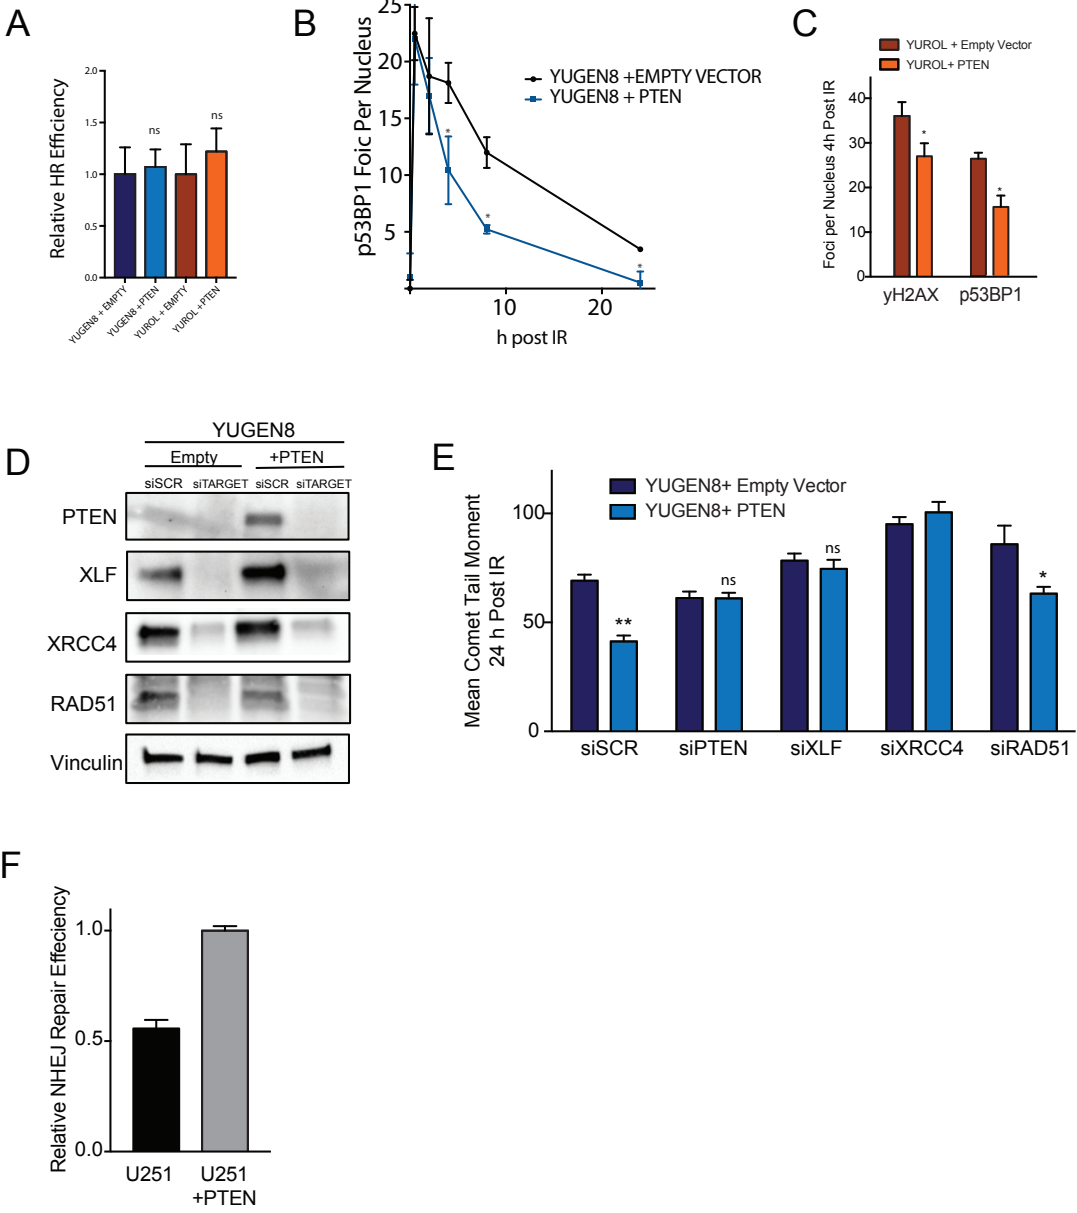

**Supplementary Figure S2.**

(A) Quantification of HDR reporter assay performed YUGEN8 or YUROL patient-derived melanoma cultures complemented with pBABE-PURO PTEN or empty vector control. (B) Quantification of p53BP1 foci per nucleus in YUGEN8 melanoma cultures complemented with pBABE-PURO PTEN or empty vector control 0-24 h post 5 Gy IR. (C) Quantification of  $\gamma$ H2AX or p53BP1 foci per nucleus 4 h after 5 Gy IR in YUGEN8 or YUROL patient-derived melanoma cultures complemented with pBABE-PURO PTEN or empty vector control. (D) Western blot analysis of siRNA knockdown of PTEN, XLF, XRCC4, and RAD51 in the YUGEN8 cells complemented with pBABE-PURO PTEN or empty vector control. Vinculin is used as a loading control. (E) Quantification of neutral comet assay performed 24h after 5 Gy IR with indicated siRNAs in YUGEN8 cells complemented with pBABE-PURO PTEN or empty vector control. Cells were irradiated 96 h after transfection with indicated siRNAs. (F) Quantification of the NHEJ luciferase-based reporter assay in the U251 cells with and without doxycycline induction of PTEN.
