# Supplementary material
Source: PubMed Central journal article supplement (PMC6072556)
Supplement: NIHMS964306-supplement-4.pdf [file NIHMS964306-supplement-4.pdf]

## Supplementary Figure S4

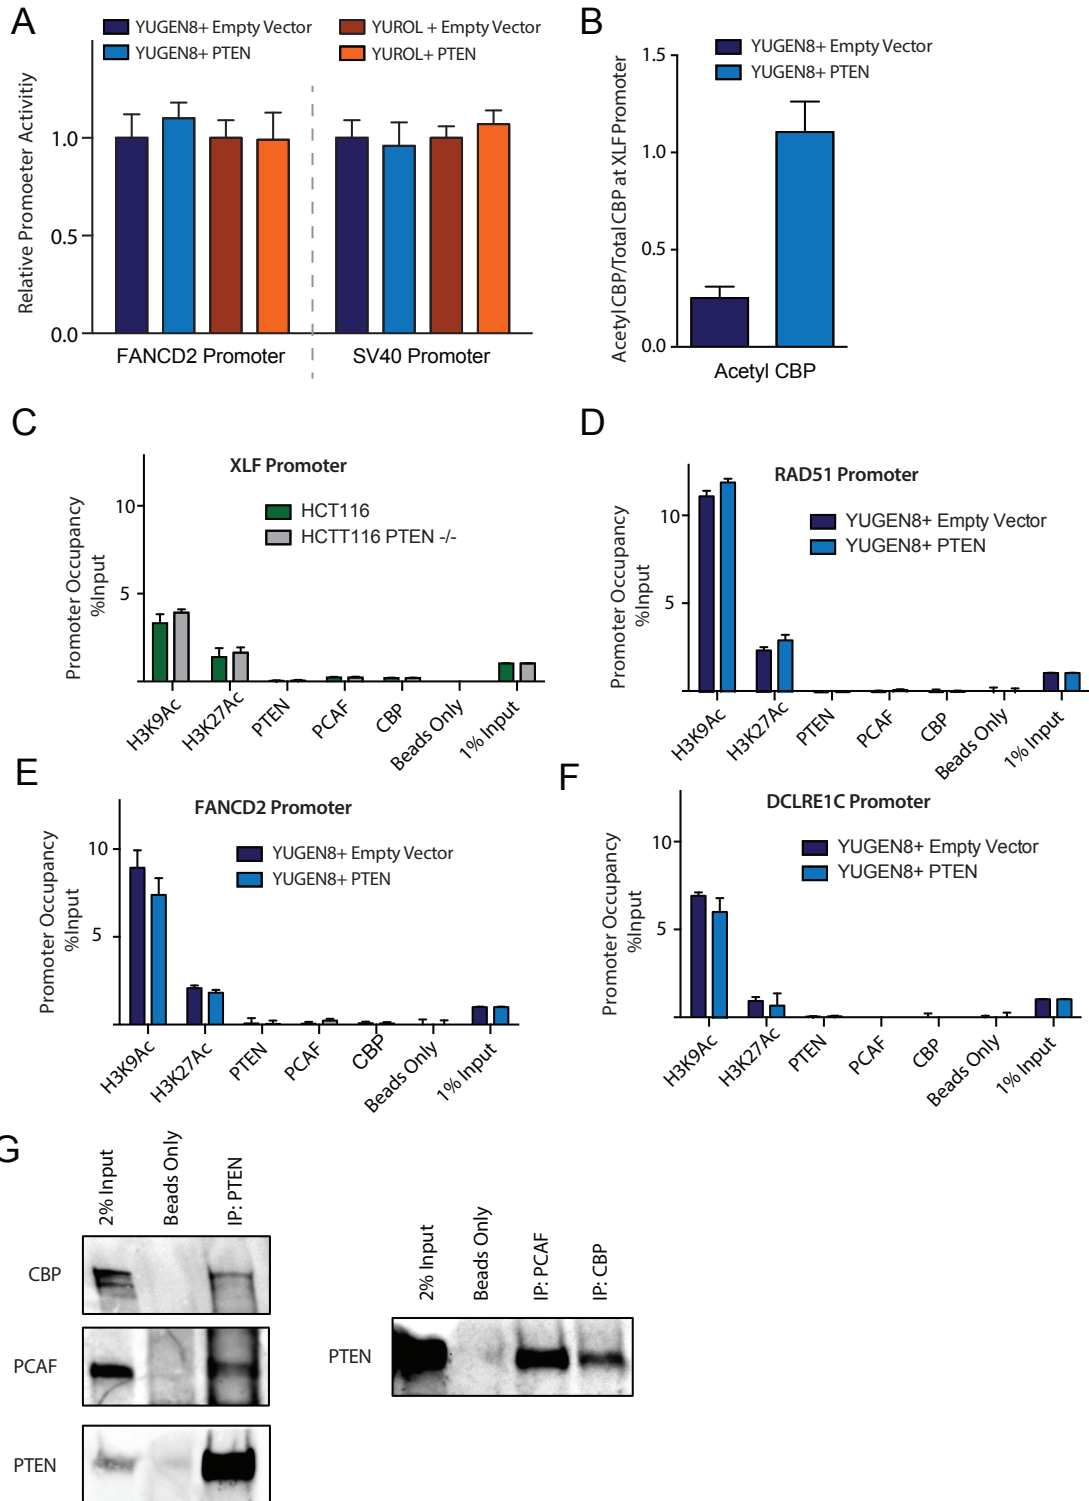

**Supplementary Figure S4.**

(A) Quantification of FANCD2 and SV40 promoter activity using a luciferase based promoter reporter assay. (B) Ch-IP qPCR analysis of active, acetyl CBP at the XLF promoter. Active CBP is calculated as a ratio of the percent input total CBP divided by that of the acetyl CBP. (C) Promoter occupancy of indicated factors measured by Ch-IP qPCR at the XLF promoter in PTEN <sup>-/-</sup> or parental HCT116 cells. (D-F) Promoter occupancy of indicated factors measured by Ch-IP qPCR at the RAD51, FANCD2 and DCLRE1C (Artemis gene) promoters in YUGEN8 cells complemented with pBABE-PURO PTEN or empty vector control. (G) Immunoprecipitation and western blot of indicated factors in the YUGASP cells expressing endogenous PTEN.
