# Supplementary material
Source: PubMed Central journal article supplement (PMC6072556)
Supplement: NIHMS964306-supplement-5.pdf [file NIHMS964306-supplement-5.pdf]

## Supplementary Figure S5

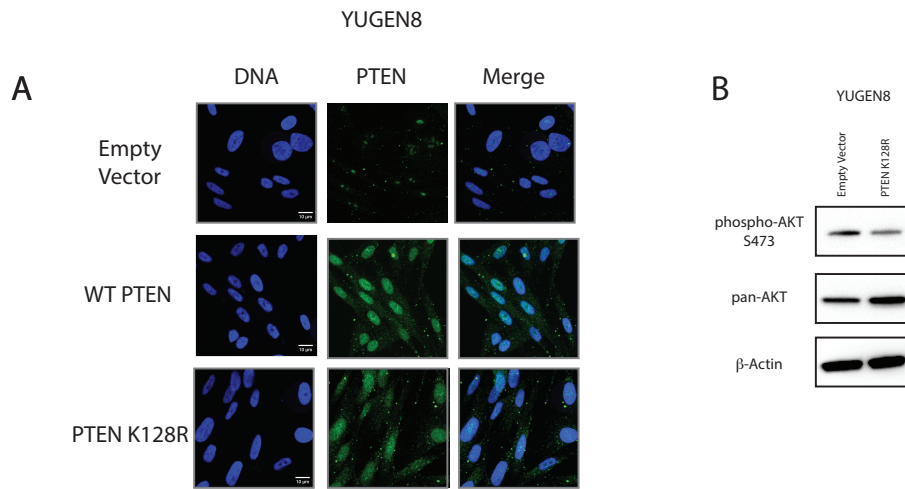

### Supplementary Figure S5.

(A) Representative images of PTEN immunofluorescence staining in YUGEN8 cells complemented with pBABE-PURO PTEN, pBABE-PURO PTEN K128R, or empty vector control. (B) Western blot analysis of phospho-AKT, S427, pan-AKT and  $\beta$ -actin in YUGEN8 cells complemented with pBABE-PURO PTEN K128R or empty vector control.
